# Supplementary material for: JEPEGMIX: gene-level joint analysis of functional SNPs in cosmopolitan cohorts
Source: PubMed Central journal article supplement — Bioinformatics. 2015 Oct 1;32(2):295–7. doi: 10.1093/bioinformatics/btv567 (PMC4708106; doi:10.1093/bioinformatics/btv567), 2015-10-01
Supplement: supp_btv567_jepegmix_supplementary_data.pdf [file supp_btv567_jepegmix_supplementary_data.pdf]

## S1. Obtaining the ethnic proportions of cosmopolitan cohorts (Lee et al., 2015a)

Assume that individual genotypes in the study cohort is a mixture of random genotypes from (not admixed from) the  $N$  ethnic groups in the reference panel with weight vector  $W = [w_i]_{N \times 1}$ . Let  $S$  be the vector of GWAS SNP reference allele frequencies (RAFTs). Let  $P = [P_i]_{L \times N}$  be the RAF matrix of the reference population ethnicities for the measured SNPs, where  $P_i$  is the RAF vector of the  $i^{th}$  ethnicity of the reference panel. Under the assumption, the study cohort RAF vector can be expressed as a weighted sum of RAF vectors of reference population ethnicities with  $W = [w_i]_{N \times 1}$ :  $S = \sum_{i=1}^N w_i P_i$ . After straightforward algebraic manipulations:

$$Cov(P, S) = Cov(P, \sum_{i=1}^N w_i P_i) = Cov(P, PW) = Cov(P)W.$$

Linear/quadratic programming methods can be employed to estimate  $w$  subject to constraints  $\sum_{i=1}^N w_i = 1$  and  $0 \leq w_i \leq 1$ . However, due to the large number of SNPs, even simply solving the linear system without constraints ( $\hat{W} = Cov(P)^{-1} Cov(P, S)$ ) and substituting zero for the (very) few small negative proportions, can yield very accurate weights.

Alternatively, when GWAS RAFTs are not available, users can pre-specify the weights based on their prior knowledge on ethnic composition of the study cohort of interest. This option should be most useful when i) fairly accurate proportion information about ethnicities involved in the cohort is available and ii) all ethnicities in the cohort have reasonably close proxies in the reference panels.

## S2. Computing LD patterns for cosmopolitan cohorts (Lee et al., 2015a)

Based on estimated/pre-specified weights  $\hat{W} = [\hat{w}_i]_{N \times 1}$ , we estimate the cohort genotype correlation matrix  $\Sigma$  in a three step process. First, estimate the cohort genotype covariance matrix  $C$  of SNPs within a genomic region as

$$\hat{C} = \sum_{i=1}^N \hat{w}_i \hat{C}_i + \sum_{i=1}^N \hat{w}_i (\hat{\mu}_i - \hat{\mu})(\hat{\mu}_i - \hat{\mu})^T,$$

where  $\hat{\mu}_i$  and  $\hat{C}_i$  are the estimated genotype mean (twice the RAF) vector and variance-covariance matrix for the  $i^{th}$  ethnic group respectively and  $\hat{\mu}$  is the estimated cohort genotype mean vector computed as  $\sum_{i=1}^N \hat{w}_i \hat{\mu}_i$ . Second, normalize  $C$  to obtain the correlation matrix,  $\Sigma$ , by

dividing each covariance by the product of the corresponding SNP genotype standard deviations. To avoid ill-conditioned mixture correlation matrix due to the highly correlated LD structure, we add a ridge adjustment, heuristically set to  $\lambda = 2/\sqrt{n}$  (where  $n$  is the sample size of the reference population), to the diagonal elements of  $\Sigma$  (Lee et al., 2015b; Pasaniuc et al., 2014; Pickrell, 2014). The estimated mixture LD matrix  $\Sigma$  is subsequently used in our imputation (DIST, Method S3) and gene-level joint testing procedures (JEPEG, Method S4).

### **S3. Imputing summary statistics of unmeasured functional SNPs (Lee et al., 2015b)**

Let  $Z_u$  be the vector of Z-scores of unmeasured functional variants in the non-overlapping prediction window with a fixed length (0.1 mega base pairs (Mb) by default). Denote as  $Z_m$  the vector of Z-scores of all measured variants (including non-annotated measured variants) within the extended window [i.e. the prediction window with two fixed-length flanking regions (0.2 Mb by default)]. Let  $\Sigma_{u,m}$  be the LD correlation matrix between the unmeasured and measured variants and  $\Sigma_{m,m}$  be the LD correlation matrix among the measured variants, as estimated from a reference panel.  $\Sigma_{u,m}$  and  $\Sigma_{m,m}$  are estimated as presented in Text S2. By using the classical conditional mean formula (Lee et al., 2013),  $Z_u$  can be imputed as

$$Z_u = \Sigma_{u,m}(\Sigma_{m,m})^{-1}Z_m.$$

The variance-covariance matrix (proxy imputation information measure) of  $Z_u$  can be subsequently estimated as

$$I_u = \Sigma_{u,m}(\Sigma_{m,m})^{-1}\Sigma_{u,m}^T.$$

To obtain imputation Z-scores with a variance of one, we normalize  $Z_u$  using the square root of  $I_u$  (Pasaniuc et al., 2014).

### **S4. Testing for the joint effect of eQTL/functional SNPs (Lee et al., 2015b)**

To test for the joint effect of eQTL/functional SNPs known to affect the expression of a gene, JEPEG was designed to rely solely on the measured and imputed association summary statistics. Based on the database-derived functional category information, JEPEG first groups

eQTL/functional SNPs affecting the same gene into the above mentioned six categories: 1) SNPs directly affecting protein function/structure encoded by a gene, i.e. protein function/structure (PFS) (e.g. stop codons), 2) SNPs affecting expression of a gene by disrupting its transcription factor binding sites (TFBS), 3) SNPs affecting the gene function by interrupting biogenesis of an miRNA (miRNA Structure), 4) SNPs affecting miRNA–mRNA target interaction (miRNA Target) and non-categorized/empirically derived 5) cis- and 6) trans-eQTLs. These functional SNPs can belong to one or more categories/genes simultaneously. To avoid a large number of degrees of freedom for the resulting test statistic (while simultaneously assessing the contribution of each functional category to the overall signal), we pool together statistics of all SNPs from the same functional category, in a single synthetic category score. This score is a weighted sum of the Z-scores associated with the SNPs in the functional category. The weighted sums of all functional categories influencing a gene are subsequently combined in a gene-level statistic by using a Mahalanobis-type statistic, which takes into account their multivariate correlation (as estimated from a relevant reference panel).

In more detail, let  $Z$  be the vector of measured and imputed Z-scores for  $m$  SNPs functionally associated with the gene under investigation,  $Y$  be the diagonal matrix of the square root of imputation information for the  $m$  functional SNPs,  $S$  be the weight matrix, as derived from the SNP annotation database, for the  $m$  functional SNPs belonging to the  $k$  functional categories.  $S$  consists of  $m$  column vectors representing weight scores of the  $k$  functional categories per SNP, which are pre-calculated on the basis of the consensus of results from diverse prediction methods and stored in the JEPEG annotation database (see Text 1 in the supplementary data of (Lee et al., 2015b)). To down-weight SNPs with low imputation information, based on  $Y$  and  $S$ , we compute the adjusted weight matrix by accounting for the imputation information of the SNPs:  $W = SY$ . Let  $\Sigma_G$  be the correlation matrix of SNP genotypes, e.g. as estimated from a reference panel,  $U$  be the vector of weighted sum of Z-scores by category (i.e. the synthetic scores) and  $\Sigma_U$  be the variance-covariance/correlation matrix of  $U$ . Then, in mathematical notation:

$$U = WZ \text{ and } \Sigma_U = W\Sigma_ZW^T,$$

where  $\Sigma_Z$  is the covariance/correlation matrix of  $Z$ . Given that, under the null hypothesis of no association between genotype and trait ( $H_0$ ),  $Z$  is asymptotically distributed as a multivariate normal with a zero mean vector and covariance matrix  $\Sigma_G$ , it follows that:

$$\Sigma_U = W\Sigma_GW^T.$$

$\Sigma_G$  is estimated as shown in Text S2. Due to linkage disequilibrium,  $\Sigma_G$  might be close to singular, which results in unstable estimation of the gene-based test statistic. Thus, to stabilize JEPEG statistic, we add the DIST ridge adjustment to the diagonal elements of  $\Sigma_G$ . Based on the synthetic scores of all functional categories affecting the gene and their correlation structure, JEPEG computes an omnibus gene-level test as

$$T = U^T \Sigma_U^{-1} U,$$

which, under  $H_0$ , is asymptotically distributed as a central  $\chi^2$  statistic with  $k$  df. The two-tailed p-values associated with the normalized  $U$  can be used as a post-hoc measure to evaluate the contribution of each functional category to the omnibus gene signal.

## S5. Assessing the Type I error rate

To compare the Type I error rate of the proposed method with that of JEPEG, we considered two different cosmopolitan cohort scenarios based on the 1000 Genomes haplotypic data: 1) 30% CEU + 25% CHS + 5% PUR + 40% YRI (Cohort 1) and 2) 10% ASW + 15% CEU + 15% CHB + 12.5% CHS + 15% GBR + 10% MXL + 2.5% PUR + 20% YRI (Cohort 2). For each scenario, we simulated 100 genotypic data of 10,000 subjects for Illumina 1M autosomal SNPs. Each simulation consists of 5,000 cases and 5,000 controls, for which the case-control status was randomly assigned (i.e. under the null hypothesis of no association). Summary statistics were obtained by regressing the simulated SNP genotypes on the case control status. Using the 100 summary data sets of each cohort, we estimated empirical Type I error rates for JEPEGMIX and JEPEG across different nominal levels. To compute JEPEG Type I error, we simply used 1000 Genomes Phase I Europeans as a reference population.

Fig. S1. Relative Type I error rate (the empirical Type I error rate divided by the nominal Type I error rate) as a function of the study cohort scenario and method used.

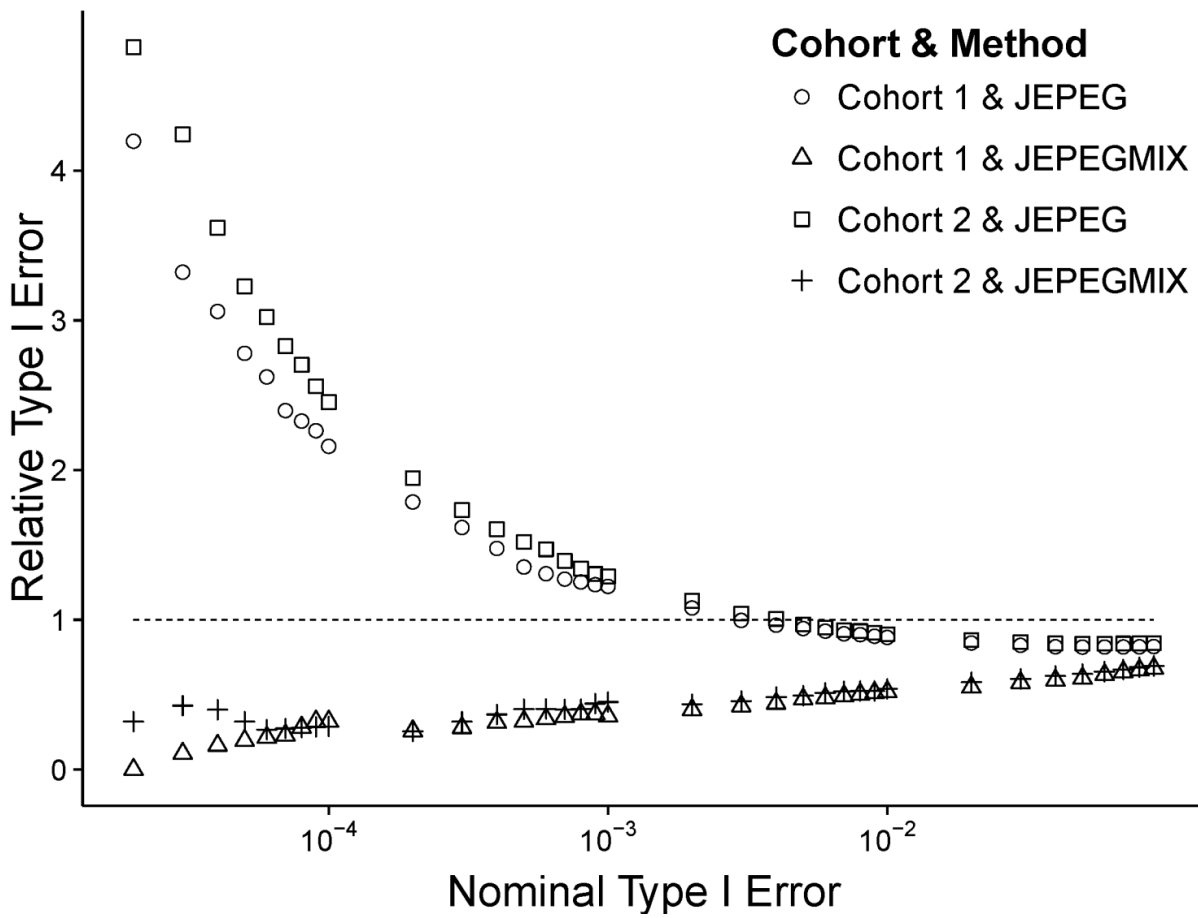

**Table S1. Genes with JEPEGMIX p-values deemed significant at an FDR q-value < 0.05. Genes from the MHC region are colored in red.**

| Gene Name   | CHR | Start Position | End Position | Chi-square | Df | JEPEG p-value |
|-------------|-----|----------------|--------------|------------|----|---------------|
| BTN3A2      | 6   | 26,370,616     | 26,377,991   | 121.40     | 3  | 3.86E-26      |
| BTN2A1      | 6   | 26,459,997     | 26,468,545   | 110.68     | 2  | 9.27E-25      |
| OR12D3      | 6   | 29,274,486     | 29,408,720   | 94.13      | 2  | 3.63E-21      |
| DPCR1       | 6   | 30,919,878     | 30,920,890   | 78.14      | 1  | 9.59E-19      |
| KIAA1949    | 6   | 30,652,781     | 30,652,781   | 70.34      | 1  | 4.98E-17      |
| HLA-DRB5    | 6   | 32,485,524     | 32,497,943   | 73.17      | 2  | 1.29E-16      |
| HIST1H2BL   | 6   | 27,775,674     | 27,775,674   | 68.02      | 1  | 1.61E-16      |
| OR2B2       | 6   | 27,879,200     | 27,879,982   | 67.45      | 1  | 2.16E-16      |
| ZKSCAN4     | 6   | 28,219,661     | 28,219,695   | 66.73      | 1  | 3.12E-16      |
| NKAPL       | 6   | 28,227,436     | 28,228,342   | 68.10      | 2  | 1.63E-15      |
| VAR2        | 6   | 30,882,689     | 30,893,941   | 61.88      | 1  | 3.65E-15      |
| BTN3A1      | 6   | 26,405,816     | 26,415,062   | 61.92      | 2  | 3.59E-14      |
| SLC17A2     | 6   | 25,914,853     | 25,924,134   | 54.14      | 1  | 1.87E-13      |
| SLC39A8     | 4   | 103,184,239    | 103,228,734  | 54.42      | 3  | 9.15E-12      |
| HIST1H2AL   | 6   | 27,833,174     | 27,833,342   | 46.21      | 1  | 1.06E-11      |
| ZNF323      | 6   | 28,294,550     | 28,297,313   | 52.60      | 3  | 2.24E-11      |
| CYP17A1     | 10  | 104,596,981    | 104,596,981  | 41.09      | 1  | 1.46E-10      |
| TTYH3       | 7   | 2,698,634      | 2,703,979    | 42.72      | 2  | 5.30E-10      |
| SF3B1       | 2   | 198,283,305    | 198,283,305  | 38.31      | 1  | 6.02E-10      |
| MAD1L1      | 7   | 1,976,457      | 1,976,457    | 38.78      | 2  | 3.80E-09      |
| EP300       | 22  | 41,513,727     | 41,574,383   | 32.76      | 1  | 1.04E-08      |
| ZKSCAN8     | 6   | 28,120,898     | 28,120,898   | 30.98      | 1  | 2.61E-08      |
| ZKSCAN8     | 6   | 28,121,278     | 28,121,278   | 30.98      | 1  | 2.61E-08      |
| NMB         | 15  | 85,198,606     | 85,200,520   | 34.84      | 2  | 2.73E-08      |
| C10orf26    | 10  | 104,572,963    | 104,572,963  | 30.65      | 1  | 3.09E-08      |
| PTPRF       | 1   | 44,045,573     | 44,083,507   | 34.44      | 2  | 3.31E-08      |
| HIST1H1T    | 6   | 26,107,790     | 26,108,282   | 29.54      | 1  | 5.49E-08      |
| FURIN       | 15  | 91,424,574     | 91,424,574   | 29.01      | 1  | 7.19E-08      |
| GID4        | 17  | 17,948,475     | 17,948,475   | 28.85      | 1  | 7.82E-08      |
| HLA-C       | 6   | 31,237,124     | 31,239,827   | 28.36      | 1  | 1.01E-07      |
| ITIH4       | 3   | 52,852,538     | 52,861,211   | 27.21      | 1  | 1.83E-07      |
| HIST1H2BPS1 | 6   | 25,732,302     | 25,732,302   | 26.91      | 1  | 2.13E-07      |
| SYNGAP1     | 6   | 33,408,542     | 33,408,542   | 30.65      | 2  | 2.21E-07      |
| DRG2        | 17  | 18,011,140     | 18,011,140   | 25.51      | 1  | 4.40E-07      |
| SETD6       | 16  | 58,549,932     | 58,552,959   | 31.95      | 3  | 5.37E-07      |
| LRRC48      | 17  | 17,896,205     | 17,896,205   | 24.97      | 1  | 5.83E-07      |
| WBP2NL      | 22  | 42,416,056     | 42,423,110   | 24.71      | 1  | 6.66E-07      |
| DOC2A       | 16  | 30,021,402     | 30,021,402   | 24.27      | 1  | 8.38E-07      |

|          |    |             |             |       |   |          |
|----------|----|-------------|-------------|-------|---|----------|
| MPHOSPH9 | 12 | 123,661,295 | 123,705,962 | 23.94 | 1 | 9.96E-07 |
| CHRNA5   | 15 | 78,880,752  | 78,882,925  | 27.43 | 2 | 1.11E-06 |
| DGKZ     | 11 | 46,387,868  | 46,387,868  | 23.56 | 1 | 1.21E-06 |
| ITIH1    | 3  | 52,820,981  | 52,821,011  | 26.99 | 2 | 1.38E-06 |
| SNX19    | 11 | 130,750,592 | 130,784,886 | 26.56 | 2 | 1.71E-06 |
| CPEB1    | 15 | 83,215,251  | 83,215,251  | 22.48 | 1 | 2.12E-06 |
| COBLL1   | 2  | 165,551,201 | 165,578,602 | 25.88 | 2 | 2.40E-06 |
| PITPNM2  | 12 | 123,471,094 | 123,519,112 | 21.88 | 1 | 2.90E-06 |
| PCDHA2   | 5  | 140,174,622 | 140,174,865 | 21.51 | 1 | 3.51E-06 |
| VRK2     | 2  | 58,316,814  | 58,316,814  | 21.34 | 1 | 3.84E-06 |
| NDUFA6   | 22 | 42,486,723  | 42,486,723  | 24.75 | 2 | 4.22E-06 |
| DNAJA3   | 16 | 4,476,089   | 4,484,396   | 24.48 | 2 | 4.83E-06 |
| GNL3     | 3  | 52,721,305  | 52,727,257  | 20.89 | 1 | 4.87E-06 |
| MOV10    | 1  | 113,237,171 | 113,241,052 | 24.43 | 2 | 4.96E-06 |
| ATXN7    | 3  | 63,898,497  | 63,982,082  | 24.17 | 2 | 5.66E-06 |
| SBNO1    | 12 | 123,806,219 | 123,806,219 | 20.37 | 1 | 6.38E-06 |
| SDCCAG8  | 1  | 243,493,907 | 243,493,907 | 20.14 | 1 | 7.18E-06 |
| ALMS1    | 2  | 73,651,967  | 73,828,538  | 23.19 | 2 | 9.21E-06 |
| PCNXL3   | 11 | 65,386,206  | 65,386,206  | 19.43 | 1 | 1.04E-05 |
| IRF3     | 19 | 50,162,909  | 50,162,909  | 19.30 | 1 | 1.11E-05 |
| DDHD2    | 8  | 38,095,662  | 38,095,662  | 18.88 | 1 | 1.39E-05 |
| OPRD1    | 1  | 29,138,975  | 29,138,975  | 18.56 | 1 | 1.64E-05 |
| RAI1     | 17 | 17,696,531  | 17,696,755  | 18.54 | 1 | 1.67E-05 |

**Table S2. Canonical pathways for non-MHC genes which are enriched at a 0.05 significance level.**

| <b>Pathway</b>                                           | <b>p-value</b> |
|----------------------------------------------------------|----------------|
| Role of RIG1-like Receptors in Antiviral Innate Immunity | 0.003          |
| p53 Signaling                                            | 0.01           |
| LXR/RXR Activation                                       | 0.02           |
| Granzyme A Signaling                                     | 0.04           |
| Glucocorticoid Biosynthesis                              | 0.04           |
| RhoGDI Signaling                                         | 0.04           |
| NRF2-mediated Oxidative Stress Response                  | 0.04           |
| Calcium Signaling                                        | 0.05           |
| Mitochondrial Dysfunction                                | 0.05           |
| ERK/MAPK Signaling                                       | 0.05           |
| IL-15 Production                                         | 0.05           |
| Androgen Biosynthesis                                    | 0.05           |
| AMPK Signaling                                           | 0.05           |



## Reference List

- Lee,D. et al. (2015a) DISTMIX: direct imputation of summary statistics for unmeasured SNPs from mixed ethnicity cohorts. *Bioinformatics*, doi:10.1093/bioinformatics/btv348.
- Lee,D. et al. (2015b) JEPEG: a summary statistics based tool for gene-level joint testing of functional variants. *Bioinformatics*, 31, 1176-1182.
- Lee,D. et al. (2013) DIST: direct imputation of summary statistics for unmeasured SNPs. *Bioinformatics*, 29, 2925-2927.
- Pasaniuc,B. et al. (2014) Fast and accurate imputation of summary statistics enhances evidence of functional enrichment. *Bioinformatics*, 30, 2906-2914.
- Pickrell,J.K. (2014) Joint analysis of functional genomic data and genome-wide association studies of 18 human traits. *Am. J. Hum. Genet.*, 94, 559-573.
